# Supplementary material for: One-pot synthesis of porous monolith-supported gold nanoparticles as an effective recyclable catalyst
Source: Royal Society of Chemistry journal article supplement (doi:10.1039/c5ta02925b), 2015-01-01
Supplement: c5ta02925b1.pdf [file c5ta02925b1.pdf]

## ESI

### One-Pot to Porous Monolith-Supported Gold Nanoparticles as a Well Recyclable Catalyst

Yonglian Ye, Ming Jin, Decheng Wan\*

Institute of Functional Polymers, School of Materials Science and Engineering, Tongji University.

4800 Cao-an Road, Shanghai 201804, PR China.

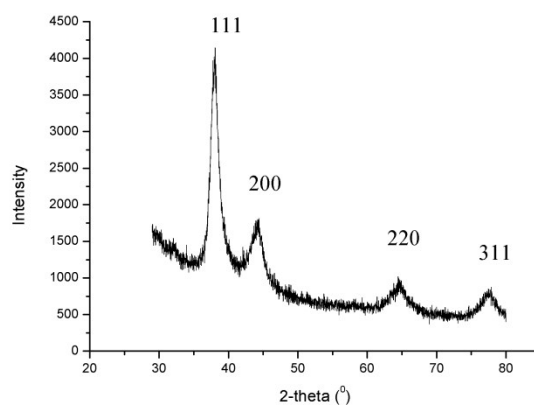

**Fig. s1.** XRD of Au-DA-polyHIPE.

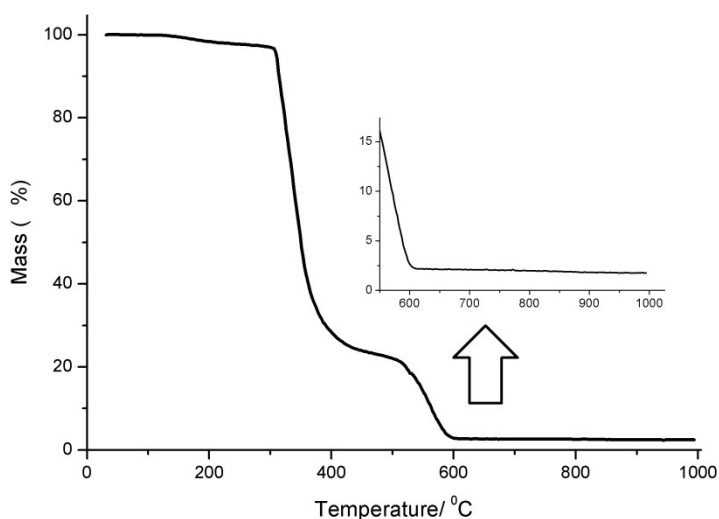

**Fig. s2.** TGA analysis of Au-DA-polyHIPE in air.

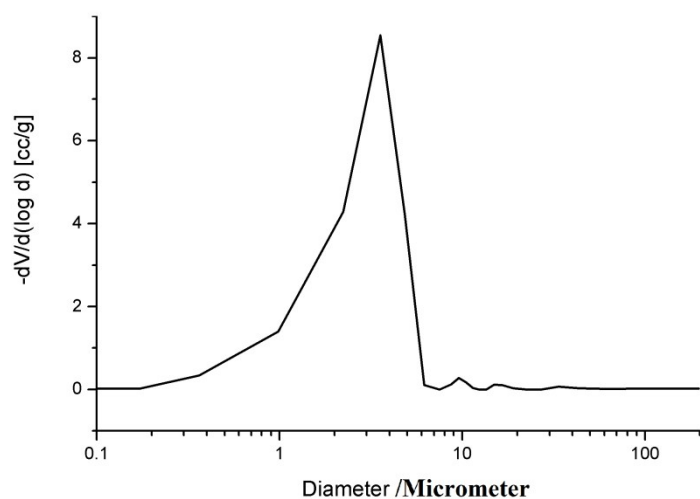

**Fig. s3.** Pore distribution of Au-DA-polyHIPE as measured by MIP.

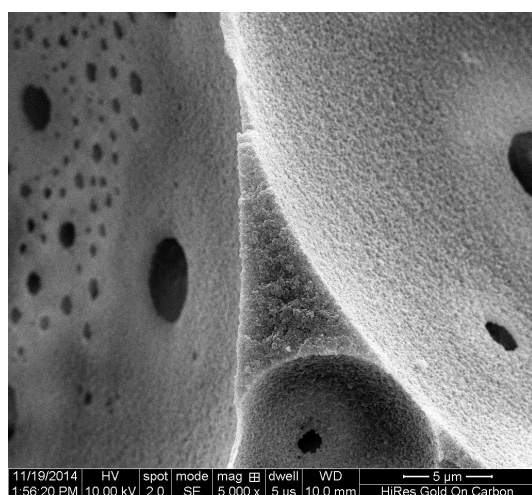

**Fig s4.** local micrograph of Au-DA-polyHIPE showing the wall thickness and open-cell structure (Right).

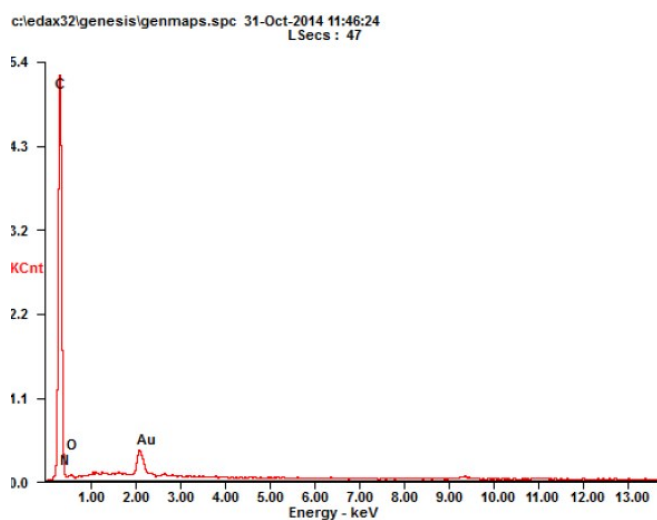

**Fig. s5.** EDX spectrum of Au-DA-polyHIPE, which shows the signals of C, N, O and Au.

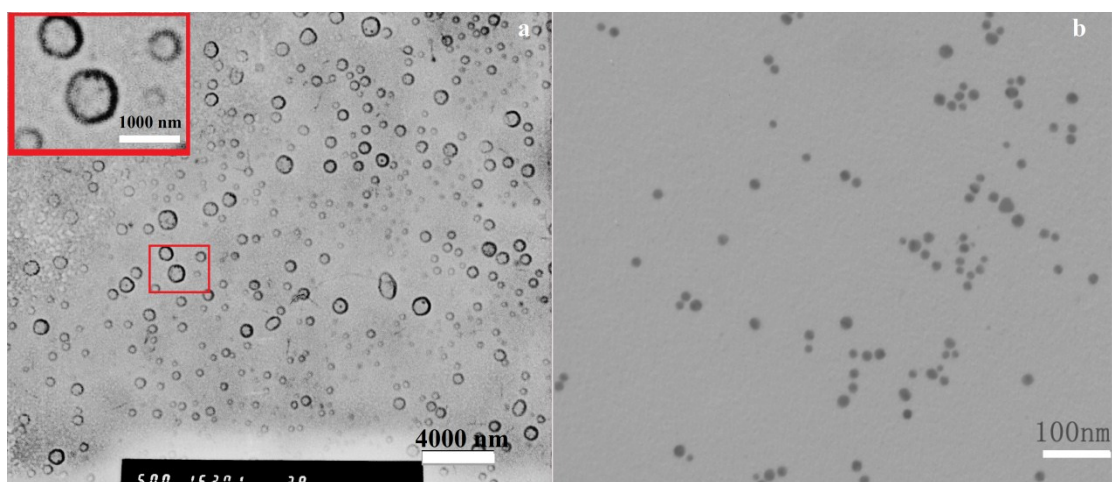

**Fig. s6.** AuNPs localize along the W/O interface (a), and undergoes redispersion after removal of the water (b). Conditions: N: Au = 16: 1

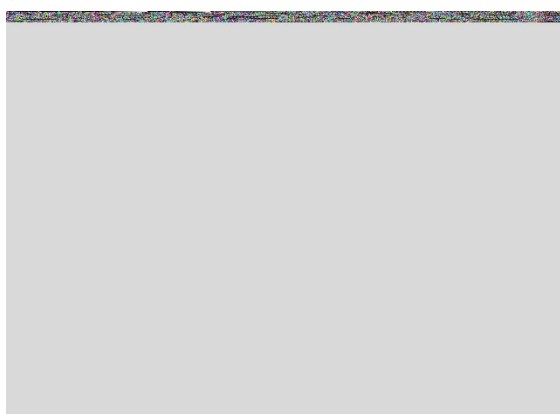

**Fig. s7.** UV/vis spectrum of DA3 stabilized AuNPs in chloroform.

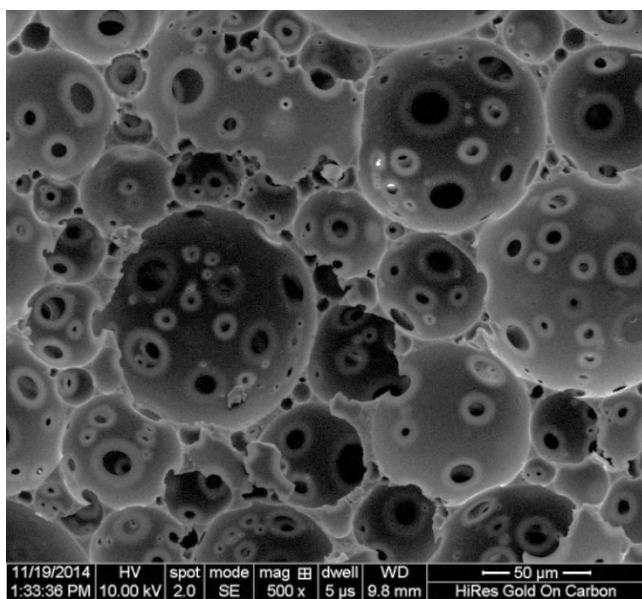

**Fig. s8.** SEM of Au-DA3 mediated Au-DA-polyHIPE.
